# Supplementary material for: Investigating circulating miRNA in transition dairy cows: What miRNAomics tells about metabolic adaptation
Source: Front Genet. 2022 Aug 23;13:946211. doi: 10.3389/fgene.2022.946211 (PMC9445238; doi:10.3389/fgene.2022.946211)
Supplement: Supplementary file 7 [file Table1.xlsx]

## Sheet: Sheet1
Supplementary Table 1: List of known and novel miRNA
bta-let-7a-3p
bta-let-7a-5p
bta-let-7b
bta-let-7c
bta-let-7d
bta-let-7e
bta-let-7f
bta-let-7g
bta-let-7i
bta-miR-1
bta-miR-100
bta-miR-101
bta-miR-10161-5p
bta-miR-10162-5p
bta-miR-10164-3p
bta-miR-10166-5p
bta-miR-10167-3p
bta-miR-10170-5p
bta-miR-10171-3p
bta-miR-10172-3p
bta-miR-10172-5p
bta-miR-10173-5p
bta-miR-10174-3p
bta-miR-10174-5p
bta-miR-10175-3p
bta-miR-10175-5p
bta-miR-10176-5p
bta-miR-10177-5p
bta-miR-10179-5p
bta-miR-10180-3p
bta-miR-10181-5p
bta-miR-10182-3p
bta-miR-10182-5p
bta-miR-10183-5p
bta-miR-10225a
bta-miR-10225b
bta-miR-103
bta-miR-105a
bta-miR-105b
bta-miR-106a
bta-miR-106b
bta-miR-107
bta-miR-10a
bta-miR-10b
bta-miR-1193
bta-miR-11971
bta-miR-11972
bta-miR-11973
bta-miR-11974
bta-miR-11975
bta-miR-11976
bta-miR-11977
bta-miR-11978
bta-miR-11979
bta-miR-11980
bta-miR-11982
bta-miR-11983
bta-miR-11984
bta-miR-11985
bta-miR-11986b
bta-miR-11986c
bta-miR-11987
bta-miR-11988
bta-miR-11989
bta-miR-11991
bta-miR-11992
bta-miR-11993
bta-miR-11994
bta-miR-11995
bta-miR-11997
bta-miR-11998
bta-miR-11999
bta-miR-12003
bta-miR-12004
bta-miR-12005
bta-miR-12006
bta-miR-12007
bta-miR-12008
bta-miR-12010
bta-miR-12015
bta-miR-12017
bta-miR-12018
bta-miR-12019
bta-miR-12023
bta-miR-12025
bta-miR-12027
bta-miR-12028
bta-miR-12030
bta-miR-12033
bta-miR-12034
bta-miR-12038
bta-miR-12039
bta-miR-12042
bta-miR-12043
bta-miR-12044
bta-miR-12045
bta-miR-12046
bta-miR-12050
bta-miR-12051
bta-miR-12055
bta-miR-12057
bta-miR-12058
bta-miR-12059
bta-miR-12060
bta-miR-12061
bta-miR-122
bta-miR-1224
bta-miR-1246
bta-miR-1247-3p
bta-miR-1247-5p
bta-miR-1248
bta-miR-1249
bta-miR-124a
bta-miR-124b
bta-miR-1251
bta-miR-125a
bta-miR-125b
bta-miR-1260b
bta-miR-126-3p
bta-miR-126-5p
bta-miR-127
bta-miR-1271
bta-miR-1277
bta-miR-128
bta-miR-1281
bta-miR-129
bta-miR-1291
bta-miR-129-3p
bta-miR-129-5p
bta-miR-1296
bta-miR-1298
bta-miR-1301
bta-miR-1306
bta-miR-1307
bta-miR-130a
bta-miR-130b
bta-miR-132
bta-miR-133a
bta-miR-133b
bta-miR-134
bta-miR-1343-3p
bta-miR-1343-5p
bta-miR-135a
bta-miR-135b
bta-miR-136
bta-miR-137
bta-miR-138
bta-miR-1388-3p
bta-miR-1388-5p
bta-miR-139
bta-miR-140
bta-miR-141
bta-miR-142-3p
bta-miR-142-5p
bta-miR-143
bta-miR-1434-5p
bta-miR-144
bta-miR-145
bta-miR-1468
bta-miR-146a
bta-miR-146b
bta-miR-147
bta-miR-148a
bta-miR-148b
bta-miR-149-3p
bta-miR-149-5p
bta-miR-150
bta-miR-151-3p
bta-miR-151-5p
bta-miR-152
bta-miR-153
bta-miR-154a
bta-miR-154b
bta-miR-154c
bta-miR-155
bta-miR-1584-3p
bta-miR-15a
bta-miR-15b
bta-miR-16a
bta-miR-16b
bta-miR-17-3p
bta-miR-17-5p
bta-miR-1777a
bta-miR-181a
bta-miR-181b
bta-miR-181c
bta-miR-181d
bta-miR-182
bta-miR-183
bta-miR-1839
bta-miR-184
bta-miR-185
bta-miR-186
bta-miR-187
bta-miR-188
bta-miR-18a
bta-miR-18b
bta-miR-190a
bta-miR-190b
bta-miR-191
bta-miR-191b
bta-miR-192
bta-miR-193a-3p
bta-miR-193a-5p
bta-miR-193b
bta-miR-194
bta-miR-1949
bta-miR-194b
bta-miR-194b-3p
bta-miR-195
bta-miR-196a
bta-miR-196b
bta-miR-197
bta-miR-199a-3p
bta-miR-199a-5p
bta-miR-199b
bta-miR-199c
bta-miR-19a
bta-miR-19b
bta-miR-200a
bta-miR-200b
bta-miR-200c
bta-miR-202
bta-miR-204
bta-miR-205
bta-miR-206
bta-miR-208a
bta-miR-208b
bta-miR-20a
bta-miR-20b
bta-miR-210
bta-miR-211
bta-miR-212
bta-miR-21-3p
bta-miR-214
bta-miR-215
bta-miR-21-5p
bta-miR-216a
bta-miR-216b
bta-miR-217
bta-miR-218
bta-miR-219
bta-miR-219-3p
bta-miR-219-5p
bta-miR-221
bta-miR-222
bta-miR-223
bta-miR-22-3p
bta-miR-224
bta-miR-22-5p
bta-miR-2284aa
bta-miR-2284ab
bta-miR-2284ac
bta-miR-2284b
bta-miR-2284c
bta-miR-2284d
bta-miR-2284e
bta-miR-2284f
bta-miR-2284h-5p
bta-miR-2284i
bta-miR-2284j
bta-miR-2284k
bta-miR-2284m
bta-miR-2284n
bta-miR-2284p
bta-miR-2284t-5p
bta-miR-2284u
bta-miR-2284v
bta-miR-2284w
bta-miR-2284x
bta-miR-2284y
bta-miR-2284z
bta-miR-2285aa
bta-miR-2285ab
bta-miR-2285ac
bta-miR-2285ad
bta-miR-2285ae
bta-miR-2285af
bta-miR-2285ah-5p
bta-miR-2285ai-5p
bta-miR-2285aj-5p
bta-miR-2285ak-5p
bta-miR-2285al-5p
bta-miR-2285am-5p
bta-miR-2285an
bta-miR-2285ar
bta-miR-2285as
bta-miR-2285at
bta-miR-2285au
bta-miR-2285av
bta-miR-2285aw
bta-miR-2285ax
bta-miR-2285b
bta-miR-2285ba
bta-miR-2285bb
bta-miR-2285bc
bta-miR-2285bd
bta-miR-2285be
bta-miR-2285bf
bta-miR-2285bg
bta-miR-2285bh
bta-miR-2285bk
bta-miR-2285bl
bta-miR-2285bm
bta-miR-2285bn
bta-miR-2285bo
bta-miR-2285bq
bta-miR-2285br
bta-miR-2285bs
bta-miR-2285bt
bta-miR-2285bu
bta-miR-2285bw
bta-miR-2285by
bta-miR-2285bz
bta-miR-2285ca
bta-miR-2285cc
bta-miR-2285cd
bta-miR-2285ce
bta-miR-2285cj
bta-miR-2285ck
bta-miR-2285cl
bta-miR-2285cm
bta-miR-2285cn
bta-miR-2285cr
bta-miR-2285cs
bta-miR-2285ct
bta-miR-2285cu
bta-miR-2285cw
bta-miR-2285cy
bta-miR-2285da
bta-miR-2285dc
bta-miR-2285dd
bta-miR-2285dg
bta-miR-2285dh
bta-miR-2285di
bta-miR-2285dj
bta-miR-2285e
bta-miR-2285f
bta-miR-2285g
bta-miR-2285h
bta-miR-2285i
bta-miR-2285j
bta-miR-2285k
bta-miR-2285m
bta-miR-2285n
bta-miR-2285o
bta-miR-2285p
bta-miR-2285q
bta-miR-2285r
bta-miR-2285t
bta-miR-2285u
bta-miR-2285v
bta-miR-2285x
bta-miR-2289
bta-miR-2295
bta-miR-2299-3p
bta-miR-2299-5p
bta-miR-2300a-5p
bta-miR-2300b-3p
bta-miR-2304
bta-miR-2305
bta-miR-2308
bta-miR-2311
bta-miR-2313-3p
bta-miR-2313-5p
bta-miR-2316
bta-miR-2319a
bta-miR-2320-3p
bta-miR-2320-5p
bta-miR-2323
bta-miR-2324
bta-miR-2328-3p
bta-miR-2328-5p
bta-miR-2329-5p
bta-miR-2330-3p
bta-miR-2330-5p
bta-miR-2331-3p
bta-miR-2332
bta-miR-2333
bta-miR-2336
bta-miR-2339
bta-miR-2340
bta-miR-2342
bta-miR-2343
bta-miR-2346
bta-miR-2349
bta-miR-2350
bta-miR-2355-3p
bta-miR-2366
bta-miR-2368-3p
bta-miR-2370-3p
bta-miR-2370-5p
bta-miR-2373-3p
bta-miR-2376
bta-miR-2377
bta-miR-2378
bta-miR-2380
bta-miR-2382-3p
bta-miR-2382-5p
bta-miR-2387
bta-miR-2388-3p
bta-miR-2388-5p
bta-miR-2389
bta-miR-2394
bta-miR-2396
bta-miR-2397-3p
bta-miR-2397-5p
bta-miR-2398
bta-miR-2399-3p
bta-miR-2399-5p
bta-miR-23a
bta-miR-23b-3p
bta-miR-23b-5p
bta-miR-2400
bta-miR-2401
bta-miR-2402
bta-miR-2403
bta-miR-2406
bta-miR-2407
bta-miR-2408
bta-miR-2409
bta-miR-2410
bta-miR-2411-3p
bta-miR-2411-5p
bta-miR-2415-3p
bta-miR-2415-5p
bta-miR-2416
bta-miR-2419-3p
bta-miR-2419-5p
bta-miR-2422
bta-miR-2423
bta-miR-2424
bta-miR-2425-3p
bta-miR-2425-5p
bta-miR-2426
bta-miR-2428
bta-miR-2431-3p
bta-miR-2431-5p
bta-miR-2432
bta-miR-2436-3p
bta-miR-2436-5p
bta-miR-2438
bta-miR-24-3p
bta-miR-2441
bta-miR-2443
bta-miR-2446
bta-miR-2447
bta-miR-2448-3p
bta-miR-2448-5p
bta-miR-2449
bta-miR-2450a
bta-miR-2451
bta-miR-2453
bta-miR-2454-3p
bta-miR-2454-5p
bta-miR-2455
bta-miR-2457
bta-miR-2458
bta-miR-2464-5p
bta-miR-2465
bta-miR-2466-3p
bta-miR-2466-5p
bta-miR-2467-3p
bta-miR-2468
bta-miR-2469
bta-miR-2472
bta-miR-2474
bta-miR-2475
bta-miR-2478
bta-miR-2483-3p
bta-miR-2483-5p
bta-miR-2484
bta-miR-25
bta-miR-26a
bta-miR-26b
bta-miR-27a-3p
bta-miR-27a-5p
bta-miR-27b
bta-miR-28
bta-miR-2885
bta-miR-2887
bta-miR-2903
bta-miR-2904
bta-miR-296-3p
bta-miR-296-5p
bta-miR-299
bta-miR-299-2
bta-miR-29a
bta-miR-29b
bta-miR-29c
bta-miR-29d-3p
bta-miR-29d-5p
bta-miR-29e
bta-miR-301a
bta-miR-301b
bta-miR-3064
bta-miR-3065
bta-miR-30a-5p
bta-miR-30b-3p
bta-miR-30b-5p
bta-miR-30c
bta-miR-30d
bta-miR-30e-5p
bta-miR-30f
bta-miR-31
bta-miR-3120
bta-miR-3154
bta-miR-32
bta-miR-320a
bta-miR-323
bta-miR-323b-3p
bta-miR-324
bta-miR-326
bta-miR-328
bta-miR-329a
bta-miR-330
bta-miR-331-3p
bta-miR-331-5p
bta-miR-335
bta-miR-338
bta-miR-339a
bta-miR-339b
bta-miR-33a
bta-miR-33b
bta-miR-340
bta-miR-342
bta-miR-3431
bta-miR-3432a
bta-miR-3432b
bta-miR-345-3p
bta-miR-345-5p
bta-miR-346
bta-miR-34a
bta-miR-34b
bta-miR-34c
bta-miR-3533
bta-miR-3601
bta-miR-361
bta-miR-3613a
bta-miR-362-3p
bta-miR-362-5p
bta-miR-363
bta-miR-365-3p
bta-miR-365-5p
bta-miR-369-3p
bta-miR-370
bta-miR-374a
bta-miR-374b
bta-miR-374c
bta-miR-375
bta-miR-376a
bta-miR-376b
bta-miR-376c
bta-miR-376d
bta-miR-376e
bta-miR-377
bta-miR-378
bta-miR-378b
bta-miR-378c
bta-miR-378d
bta-miR-379
bta-miR-380-3p
bta-miR-380-5p
bta-miR-381
bta-miR-382
bta-miR-383
bta-miR-3956
bta-miR-3957
bta-miR-409a
bta-miR-410
bta-miR-411a
bta-miR-411b
bta-miR-411c-3p
bta-miR-411c-5p
bta-miR-421
bta-miR-423-3p
bta-miR-423-5p
bta-miR-424-3p
bta-miR-424-5p
bta-miR-425-3p
bta-miR-425-5p
bta-miR-4286
bta-miR-429
bta-miR-431
bta-miR-432
bta-miR-433
bta-miR-4449
bta-miR-449a
bta-miR-449b
bta-miR-449c
bta-miR-450a
bta-miR-450b
bta-miR-451
bta-miR-452
bta-miR-4523
bta-miR-454
bta-miR-455-3p
bta-miR-455-5p
bta-miR-4657
bta-miR-483
bta-miR-484
bta-miR-485
bta-miR-486
bta-miR-487a
bta-miR-487b
bta-miR-488
bta-miR-490
bta-miR-491
bta-miR-493
bta-miR-494
bta-miR-495
bta-miR-496
bta-miR-497
bta-miR-499
bta-miR-500
bta-miR-502a
bta-miR-502b
bta-miR-503-3p
bta-miR-503-5p
bta-miR-504
bta-miR-505
bta-miR-507-3p
bta-miR-507b
bta-miR-532
bta-miR-542-5p
bta-miR-543
bta-miR-544a
bta-miR-545-3p
bta-miR-545-5p
bta-miR-551b
bta-miR-574
bta-miR-582
bta-miR-592
bta-miR-599
bta-miR-6119-3p
bta-miR-6119-5p
bta-miR-6120-3p
bta-miR-6120-5p
bta-miR-6123
bta-miR-615
bta-miR-628
bta-miR-6516
bta-miR-6517
bta-miR-6518
bta-miR-652
bta-miR-6520
bta-miR-6523a
bta-miR-6524
bta-miR-6525
bta-miR-6526
bta-miR-6527
bta-miR-6528
bta-miR-6529a
bta-miR-653
bta-miR-6531
bta-miR-6532
bta-miR-6533
bta-miR-6534
bta-miR-6535
bta-miR-654
bta-miR-656
bta-miR-660
bta-miR-664a
bta-miR-664b
bta-miR-665
bta-miR-668-3p
bta-miR-669
bta-miR-671
bta-miR-6715
bta-miR-677
bta-miR-6775
bta-miR-7
bta-miR-708
bta-miR-7180
bta-miR-744
bta-miR-758
bta-miR-760-3p
bta-miR-760-5p
bta-miR-767
bta-miR-769
bta-miR-7857-3p
bta-miR-7857-5p
bta-miR-7858
bta-miR-7859
bta-miR-7860
bta-miR-7861
bta-miR-7862
bta-miR-7863
bta-miR-8550
bta-miR-873
bta-miR-874
bta-miR-875
bta-miR-877
bta-miR-885
bta-miR-92a
bta-miR-92b
bta-miR-93
bta-miR-935
bta-miR-9-3p
bta-miR-940
bta-miR-95
bta-miR-9-5p
bta-miR-96
bta-miR-98
bta-miR-9851
bta-miR-99a-3p
bta-miR-99a-5p
bta-miR-99b
Novel:chi-let-7a-5p
Novel:chi-miR-103-3p
Novel:chi-miR-10a-3p
Novel:chi-miR-1248-5p
Novel:chi-miR-125a-5p
Novel:chi-miR-128-5p
Novel:chi-miR-129-3p
Novel:chi-miR-129-5p
Novel:chi-miR-1306-5p
Novel:chi-miR-1307-3p
Novel:chi-miR-130a-5p
Novel:chi-miR-1343
Novel:chi-miR-1388-3p
Novel:chi-miR-145-5p
Novel:chi-miR-146a
Novel:chi-miR-150
Novel:chi-miR-154a-5p
Novel:chi-miR-1839
Novel:chi-miR-18a-3p
Novel:chi-miR-197-5p
Novel:chi-miR-204-3p
Novel:chi-miR-204-5p
Novel:chi-miR-20a-3p
Novel:chi-miR-214-5p
Novel:chi-miR-221-3p
Novel:chi-miR-221-5p
Novel:chi-miR-2284a
Novel:chi-miR-2411-3p
Novel:chi-miR-26b-3p
Novel:chi-miR-27a-5p
Novel:chi-miR-28-3p
Novel:chi-miR-29b-5p
Novel:chi-miR-30a-3p
Novel:chi-miR-30b-3p
Novel:chi-miR-324-3p
Novel:chi-miR-326-3p
Novel:chi-miR-331-3p
Novel:chi-miR-338-3p
Novel:chi-miR-340-3p
Novel:chi-miR-3432-3p
Novel:chi-miR-3432-5p
Novel:chi-miR-361-3p
Novel:chi-miR-363-5p
Novel:chi-miR-378-3p
Novel:chi-miR-378-5p
Novel:chi-miR-423-5p
Novel:chi-miR-483
Novel:chi-miR-485-5p
Novel:chi-miR-497-5p
Novel:chi-miR-542-5p
Novel:chi-miR-543-5p
Novel:chi-miR-592
Novel:chi-miR-671-5p
Novel:chi-miR-708-3p
Novel:chi-miR-874-3p
Novel:chi-miR-877-3p
Novel:chi-miR-877-5p
Novel:chi-miR-9-5p
Novel:hsa-miR-10226
Novel:hsa-miR-10392-3p
Novel:hsa-miR-10396a-3p
Novel:hsa-miR-10401-3p
Novel:hsa-miR-10526-3p
Novel:hsa-miR-1184
Novel:hsa-miR-1199-5p
Novel:hsa-miR-12125
Novel:hsa-miR-12127
Novel:hsa-miR-12130
Novel:hsa-miR-12136
Novel:hsa-miR-1225-3p
Novel:hsa-miR-1228-5p
Novel:hsa-miR-1229-5p
Novel:hsa-miR-122b-5p
Novel:hsa-miR-1231
Novel:hsa-miR-1233-3p
Novel:hsa-miR-1234-3p
Novel:hsa-miR-1238-5p
Novel:hsa-miR-1247-3p
Novel:hsa-miR-1249-5p
Novel:hsa-miR-1253
Novel:hsa-miR-1255a
Novel:hsa-miR-1260a
Novel:hsa-miR-1268a
Novel:hsa-miR-1275
Novel:hsa-miR-1277-5p
Novel:hsa-miR-1278
Novel:hsa-miR-1281
Novel:hsa-miR-1285-5p
Novel:hsa-miR-1286
Novel:hsa-miR-1291
Novel:hsa-miR-1293
Novel:hsa-miR-1294
Novel:hsa-miR-1299
Novel:hsa-miR-1301-3p
Novel:hsa-miR-1304-3p
Novel:hsa-miR-1304-5p
Novel:hsa-miR-1321
Novel:hsa-miR-132-5p
Novel:hsa-miR-142-3p
Novel:hsa-miR-146b-3p
Novel:hsa-miR-1470
Novel:hsa-miR-1471
Novel:hsa-miR-149-5p
Novel:hsa-miR-1539
Novel:hsa-miR-16-1-3p
Novel:hsa-miR-181a-2-3p
Novel:hsa-miR-1827
Novel:hsa-miR-185-3p
Novel:hsa-miR-1915-5p
Novel:hsa-miR-1972
Novel:hsa-miR-1976
Novel:hsa-miR-203a-3p
Novel:hsa-miR-210-5p
Novel:hsa-miR-211-3p
Novel:hsa-miR-2114-3p
Novel:hsa-miR-2116-3p
Novel:hsa-miR-219a-2-3p
Novel:hsa-miR-2276-5p
Novel:hsa-miR-2467-3p
Novel:hsa-miR-2681-3p
Novel:hsa-miR-2861
Novel:hsa-miR-296-3p
Novel:hsa-miR-296-5p
Novel:hsa-miR-3059-5p
Novel:hsa-miR-3064-5p
Novel:hsa-miR-3065-3p
Novel:hsa-miR-3117-3p
Novel:hsa-miR-3125
Novel:hsa-miR-3126-5p
Novel:hsa-miR-3127-3p
Novel:hsa-miR-3127-5p
Novel:hsa-miR-3130-3p
Novel:hsa-miR-3136-5p
Novel:hsa-miR-3138
Novel:hsa-miR-3144-5p
Novel:hsa-miR-3153
Novel:hsa-miR-3156-3p
Novel:hsa-miR-3162-3p
Novel:hsa-miR-3175
Novel:hsa-miR-3178
Novel:hsa-miR-3182
Novel:hsa-miR-3190-3p
Novel:hsa-miR-3191-5p
Novel:hsa-miR-3192-5p
Novel:hsa-miR-3194-3p
Novel:hsa-miR-3199
Novel:hsa-miR-3202
Novel:hsa-miR-324-3p
Novel:hsa-miR-328-5p
Novel:hsa-miR-339-5p
Novel:hsa-miR-3606-5p
Novel:hsa-miR-3610
Novel:hsa-miR-3620-3p
Novel:hsa-miR-3620-5p
Novel:hsa-miR-3650
Novel:hsa-miR-3651
Novel:hsa-miR-3664-3p
Novel:hsa-miR-3665
Novel:hsa-miR-367-5p
Novel:hsa-miR-3679-3p
Novel:hsa-miR-3691-3p
Novel:hsa-miR-3691-5p
Novel:hsa-miR-3714
Novel:hsa-miR-373-5p
Novel:hsa-miR-374b-3p
Novel:hsa-miR-378j
Novel:hsa-miR-3926
Novel:hsa-miR-3927-5p
Novel:hsa-miR-3928-3p
Novel:hsa-miR-3944-3p
Novel:hsa-miR-3960
Novel:hsa-miR-3975
Novel:hsa-miR-4255
Novel:hsa-miR-4270
Novel:hsa-miR-4271
Novel:hsa-miR-4287
Novel:hsa-miR-4293
Novel:hsa-miR-4297
Novel:hsa-miR-4323
Novel:hsa-miR-4421
Novel:hsa-miR-4433b-3p
Novel:hsa-miR-4443
Novel:hsa-miR-4456
Novel:hsa-miR-4467
Novel:hsa-miR-4474-3p
Novel:hsa-miR-4476
Novel:hsa-miR-4477b
Novel:hsa-miR-4479
Novel:hsa-miR-4485-5p
Novel:hsa-miR-4487
Novel:hsa-miR-4490
Novel:hsa-miR-4497
Novel:hsa-miR-4499
Novel:hsa-miR-4502
Novel:hsa-miR-4508
Novel:hsa-miR-4515
Novel:hsa-miR-4521
Novel:hsa-miR-4529-3p
Novel:hsa-miR-4530
Novel:hsa-miR-4531
Novel:hsa-miR-4537
Novel:hsa-miR-4633-3p
Novel:hsa-miR-4639-3p
Novel:hsa-miR-4648
Novel:hsa-miR-4652-5p
Novel:hsa-miR-4660
Novel:hsa-miR-4663
Novel:hsa-miR-4665-3p
Novel:hsa-miR-4667-3p
Novel:hsa-miR-4667-5p
Novel:hsa-miR-4675
Novel:hsa-miR-4679
Novel:hsa-miR-4683
Novel:hsa-miR-4688
Novel:hsa-miR-4697-3p
Novel:hsa-miR-4698
Novel:hsa-miR-4707-3p
Novel:hsa-miR-4707-5p
Novel:hsa-miR-4708-3p
Novel:hsa-miR-4713-5p
Novel:hsa-miR-4715-3p
Novel:hsa-miR-4716-3p
Novel:hsa-miR-4722-3p
Novel:hsa-miR-4722-5p
Novel:hsa-miR-4723-5p
Novel:hsa-miR-4727-5p
Novel:hsa-miR-4731-5p
Novel:hsa-miR-4734
Novel:hsa-miR-4736
Novel:hsa-miR-4738-5p
Novel:hsa-miR-4746-5p
Novel:hsa-miR-4747-5p
Novel:hsa-miR-4750-5p
Novel:hsa-miR-4758-3p
Novel:hsa-miR-4764-5p
Novel:hsa-miR-4767
Novel:hsa-miR-4772-3p
Novel:hsa-miR-4773
Novel:hsa-miR-4779
Novel:hsa-miR-4795-5p
Novel:hsa-miR-4802-5p
Novel:hsa-miR-4804-5p
Novel:hsa-miR-484
Novel:hsa-miR-488-3p
Novel:hsa-miR-490-5p
Novel:hsa-miR-4999-5p
Novel:hsa-miR-5006-5p
Novel:hsa-miR-5009-3p
Novel:hsa-miR-500b-3p
Novel:hsa-miR-5010-3p
Novel:hsa-miR-504-3p
Novel:hsa-miR-505-5p
Novel:hsa-miR-5089-5p
Novel:hsa-miR-5094
Novel:hsa-miR-509-5p
Novel:hsa-miR-510-5p
Novel:hsa-miR-5187-3p
Novel:hsa-miR-5187-5p
Novel:hsa-miR-5192
Novel:hsa-miR-5193
Novel:hsa-miR-544b
Novel:hsa-miR-548u
Novel:hsa-miR-551b-5p
Novel:hsa-miR-552-3p
Novel:hsa-miR-556-5p
Novel:hsa-miR-5572
Novel:hsa-miR-5582-3p
Novel:hsa-miR-5586-3p
Novel:hsa-miR-561-3p
Novel:hsa-miR-561-5p
Novel:hsa-miR-5691
Novel:hsa-miR-5693
Novel:hsa-miR-571
Novel:hsa-miR-574-3p
Novel:hsa-miR-581
Novel:hsa-miR-583
Novel:hsa-miR-584-5p
Novel:hsa-miR-591
Novel:hsa-miR-593-3p
Novel:hsa-miR-605-3p
Novel:hsa-miR-607
Novel:hsa-miR-6071
Novel:hsa-miR-6075
Novel:hsa-miR-6079
Novel:hsa-miR-6085
Novel:hsa-miR-6089
Novel:hsa-miR-6090
Novel:hsa-miR-612
Novel:hsa-miR-6124
Novel:hsa-miR-6132
Novel:hsa-miR-6134
Novel:hsa-miR-615-3p
Novel:hsa-miR-615-5p
Novel:hsa-miR-619-3p
Novel:hsa-miR-620
Novel:hsa-miR-626
Novel:hsa-miR-629-3p
Novel:hsa-miR-631
Novel:hsa-miR-635
Novel:hsa-miR-636
Novel:hsa-miR-637
Novel:hsa-miR-642a-5p
Novel:hsa-miR-6501-3p
Novel:hsa-miR-6511b-5p
Novel:hsa-miR-6512-3p
Novel:hsa-miR-6515-5p
Novel:hsa-miR-661
Novel:hsa-miR-663a
Novel:hsa-miR-664a-3p
Novel:hsa-miR-668-5p
Novel:hsa-miR-6715b-3p
Novel:hsa-miR-6716-5p
Novel:hsa-miR-6721-5p
Novel:hsa-miR-6727-5p
Novel:hsa-miR-6730-3p
Novel:hsa-miR-6732-3p
Novel:hsa-miR-6734-3p
Novel:hsa-miR-6734-5p
Novel:hsa-miR-6735-3p
Novel:hsa-miR-6739-3p
Novel:hsa-miR-6740-5p
Novel:hsa-miR-6742-5p
Novel:hsa-miR-6747-5p
Novel:hsa-miR-6749-3p
Novel:hsa-miR-6749-5p
Novel:hsa-miR-6751-5p
Novel:hsa-miR-6752-3p
Novel:hsa-miR-6752-5p
Novel:hsa-miR-6753-3p
Novel:hsa-miR-6756-5p
Novel:hsa-miR-6760-5p
Novel:hsa-miR-6761-5p
Novel:hsa-miR-6762-3p
Novel:hsa-miR-6762-5p
Novel:hsa-miR-6763-3p
Novel:hsa-miR-6765-3p
Novel:hsa-miR-6765-5p
Novel:hsa-miR-6768-3p
Novel:hsa-miR-6769a-3p
Novel:hsa-miR-6770-5p
Novel:hsa-miR-6771-5p
Novel:hsa-miR-6772-5p
Novel:hsa-miR-6777-5p
Novel:hsa-miR-6778-3p
Novel:hsa-miR-6779-3p
Novel:hsa-miR-6780b-3p
Novel:hsa-miR-6781-5p
Novel:hsa-miR-6782-5p
Novel:hsa-miR-6787-3p
Novel:hsa-miR-6791-3p
Novel:hsa-miR-6795-5p
Novel:hsa-miR-6798-5p
Novel:hsa-miR-6800-5p
Novel:hsa-miR-6801-3p
Novel:hsa-miR-6803-3p
Novel:hsa-miR-6807-5p
Novel:hsa-miR-6810-5p
Novel:hsa-miR-6811-3p
Novel:hsa-miR-6814-5p
Novel:hsa-miR-6815-3p
Novel:hsa-miR-6817-3p
Novel:hsa-miR-6821-3p
Novel:hsa-miR-6823-5p
Novel:hsa-miR-6825-5p
Novel:hsa-miR-6826-3p
Novel:hsa-miR-6827-5p
Novel:hsa-miR-6829-5p
Novel:hsa-miR-6834-5p
Novel:hsa-miR-6840-3p
Novel:hsa-miR-6840-5p
Novel:hsa-miR-6845-3p
Novel:hsa-miR-6846-3p
Novel:hsa-miR-6846-5p
Novel:hsa-miR-6852-5p
Novel:hsa-miR-6856-3p
Novel:hsa-miR-6861-3p
Novel:hsa-miR-6867-3p
Novel:hsa-miR-6869-3p
Novel:hsa-miR-6873-5p
Novel:hsa-miR-6878-5p
Novel:hsa-miR-6880-3p
Novel:hsa-miR-6881-3p
Novel:hsa-miR-6882-3p
Novel:hsa-miR-6885-3p
Novel:hsa-miR-6887-3p
Novel:hsa-miR-6889-3p
Novel:hsa-miR-6890-3p
Novel:hsa-miR-6890-5p
Novel:hsa-miR-6892-3p
Novel:hsa-miR-6894-3p
Novel:hsa-miR-7106-3p
Novel:hsa-miR-7106-5p
Novel:hsa-miR-7108-5p
Novel:hsa-miR-7109-5p
Novel:hsa-miR-711
Novel:hsa-miR-7110-3p
Novel:hsa-miR-7112-3p
Novel:hsa-miR-7112-5p
Novel:hsa-miR-7113-3p
Novel:hsa-miR-7113-5p
Novel:hsa-miR-7114-5p
Novel:hsa-miR-7150
Novel:hsa-miR-7151-5p
Novel:hsa-miR-7154-3p
Novel:hsa-miR-7155-5p
Novel:hsa-miR-7160-5p
Novel:hsa-miR-744-5p
Novel:hsa-miR-7515
Novel:hsa-miR-760
Novel:hsa-miR-762
Novel:hsa-miR-765
Novel:hsa-miR-766-5p
Novel:hsa-miR-7845-5p
Novel:hsa-miR-7847-3p
Novel:hsa-miR-8057
Novel:hsa-miR-8060
Novel:hsa-miR-8077
Novel:hsa-miR-873-3p
Novel:hsa-miR-873-5p
Novel:hsa-miR-887-5p
Novel:hsa-miR-920
Novel:hsa-miR-921
Novel:hsa-miR-937-5p
Novel:hsa-miR-939-3p
Novel:hsa-miR-939-5p
Novel:hsa-miR-940
Novel:hsa-miR-942-5p
Novel:hsa-miR-943
Novel:hsa-miR-9851-5p
Novel:hsa-miR-9899
Novel:hsa-miR-9902
Novel:hsa-miR-9903
Novel:NC_037328.1_1021
Novel:NC_037328.1_1114
Novel:NC_037328.1_1126
Novel:NC_037328.1_1246
Novel:NC_037328.1_1382
Novel:NC_037328.1_1526
Novel:NC_037328.1_1549
Novel:NC_037328.1_1626
Novel:NC_037328.1_1657
Novel:NC_037328.1_202
Novel:NC_037328.1_2069
Novel:NC_037328.1_2111
Novel:NC_037328.1_2137
Novel:NC_037328.1_2156
Novel:NC_037328.1_2164
Novel:NC_037328.1_2171
Novel:NC_037328.1_2210
Novel:NC_037328.1_225
Novel:NC_037328.1_438
Novel:NC_037328.1_521
Novel:NC_037328.1_543
Novel:NC_037328.1_636
Novel:NC_037328.1_659
Novel:NC_037329.1_2395
Novel:NC_037329.1_2459
Novel:NC_037329.1_2499
Novel:NC_037329.1_2588
Novel:NC_037329.1_2618
Novel:NC_037329.1_2626
Novel:NC_037329.1_2721
Novel:NC_037329.1_2722
Novel:NC_037329.1_2728
Novel:NC_037329.1_2775
Novel:NC_037329.1_2801
Novel:NC_037329.1_2891
Novel:NC_037329.1_3175
Novel:NC_037329.1_3304
Novel:NC_037329.1_3332
Novel:NC_037329.1_3385
Novel:NC_037329.1_3418
Novel:NC_037329.1_3458
Novel:NC_037329.1_3476
Novel:NC_037329.1_3479
Novel:NC_037329.1_3497
Novel:NC_037329.1_3543
Novel:NC_037329.1_3545
Novel:NC_037329.1_3554
Novel:NC_037329.1_3718
Novel:NC_037329.1_3969
Novel:NC_037329.1_4078
Novel:NC_037329.1_4285
Novel:NC_037329.1_4344
Novel:NC_037329.1_4388
Novel:NC_037329.1_4389
Novel:NC_037329.1_4439
Novel:NC_037329.1_4453
Novel:NC_037329.1_4528
Novel:NC_037329.1_4542
Novel:NC_037329.1_4544
Novel:NC_037329.1_4557
Novel:NC_037329.1_4566
Novel:NC_037330.1_4708
Novel:NC_037330.1_4723
Novel:NC_037330.1_4790
Novel:NC_037330.1_4811
Novel:NC_037330.1_4839
Novel:NC_037330.1_4980
Novel:NC_037330.1_5007
Novel:NC_037330.1_5048
Novel:NC_037330.1_5052
Novel:NC_037330.1_5174
Novel:NC_037330.1_5176
Novel:NC_037330.1_5177
Novel:NC_037330.1_5339
Novel:NC_037330.1_5361
Novel:NC_037330.1_5426
Novel:NC_037330.1_5477
Novel:NC_037330.1_5519
Novel:NC_037330.1_5557
Novel:NC_037330.1_5586
Novel:NC_037330.1_5594
Novel:NC_037330.1_5647
Novel:NC_037330.1_5667
Novel:NC_037330.1_5676
Novel:NC_037330.1_5730
Novel:NC_037330.1_5741
Novel:NC_037330.1_5755
Novel:NC_037330.1_5852
Novel:NC_037330.1_5920
Novel:NC_037330.1_6070
Novel:NC_037330.1_6384
Novel:NC_037330.1_6557
Novel:NC_037330.1_6596
Novel:NC_037330.1_6670
Novel:NC_037330.1_6676
Novel:NC_037330.1_6706
Novel:NC_037330.1_6761
Novel:NC_037331.1_6943
Novel:NC_037331.1_6958
Novel:NC_037331.1_6998
Novel:NC_037331.1_7177
Novel:NC_037331.1_7285
Novel:NC_037331.1_7530
Novel:NC_037331.1_7629
Novel:NC_037331.1_7667
Novel:NC_037331.1_7721
Novel:NC_037331.1_7797
Novel:NC_037331.1_7801
Novel:NC_037331.1_7941
Novel:NC_037331.1_8258
Novel:NC_037331.1_8265
Novel:NC_037331.1_8270
Novel:NC_037331.1_8278
Novel:NC_037331.1_8398
Novel:NC_037331.1_8400
Novel:NC_037331.1_8583
Novel:NC_037331.1_8590
Novel:NC_037331.1_8783
Novel:NC_037331.1_8801
Novel:NC_037331.1_8835
Novel:NC_037331.1_8865
Novel:NC_037331.1_8874
Novel:NC_037332.1_10019
Novel:NC_037332.1_10075
Novel:NC_037332.1_10087
Novel:NC_037332.1_10089
Novel:NC_037332.1_10112
Novel:NC_037332.1_10113
Novel:NC_037332.1_10295
Novel:NC_037332.1_10348
Novel:NC_037332.1_10520
Novel:NC_037332.1_10522
Novel:NC_037332.1_10586
Novel:NC_037332.1_10589
Novel:NC_037332.1_10918
Novel:NC_037332.1_10945
Novel:NC_037332.1_11006
Novel:NC_037332.1_11065
Novel:NC_037332.1_11150
Novel:NC_037332.1_11151
Novel:NC_037332.1_8913
Novel:NC_037332.1_8970
Novel:NC_037332.1_9064
Novel:NC_037332.1_9149
Novel:NC_037332.1_9162
Novel:NC_037332.1_9187
Novel:NC_037332.1_9297
Novel:NC_037332.1_9314
Novel:NC_037332.1_9409
Novel:NC_037332.1_9482
Novel:NC_037332.1_9492
Novel:NC_037332.1_9513
Novel:NC_037332.1_9615
Novel:NC_037332.1_9637
Novel:NC_037332.1_9781
Novel:NC_037332.1_9796
Novel:NC_037332.1_9889
Novel:NC_037332.1_9900
Novel:NC_037332.1_9909
Novel:NC_037332.1_9923
Novel:NC_037332.1_9930
Novel:NC_037332.1_9950
Novel:NC_037332.1_9954
Novel:NC_037333.1_11349
Novel:NC_037333.1_11400
Novel:NC_037333.1_11451
Novel:NC_037333.1_11519
Novel:NC_037333.1_11559
Novel:NC_037333.1_11582
Novel:NC_037333.1_11826
Novel:NC_037333.1_11969
Novel:NC_037333.1_11999
Novel:NC_037333.1_12024
Novel:NC_037333.1_12081
Novel:NC_037333.1_12085
Novel:NC_037333.1_12169
Novel:NC_037333.1_12225
Novel:NC_037333.1_12305
Novel:NC_037333.1_12628
Novel:NC_037333.1_12667
Novel:NC_037333.1_12686
Novel:NC_037333.1_12689
Novel:NC_037333.1_12750
Novel:NC_037333.1_12751
Novel:NC_037333.1_12752
Novel:NC_037333.1_12758
Novel:NC_037334.1_12855
Novel:NC_037334.1_12865
Novel:NC_037334.1_12868
Novel:NC_037334.1_12888
Novel:NC_037334.1_12938
Novel:NC_037334.1_12971
Novel:NC_037334.1_12994
Novel:NC_037334.1_13105
Novel:NC_037334.1_13107
Novel:NC_037334.1_13126
Novel:NC_037334.1_13139
Novel:NC_037334.1_13173
Novel:NC_037334.1_13247
Novel:NC_037334.1_13257
Novel:NC_037334.1_13259
Novel:NC_037334.1_13261
Novel:NC_037334.1_13289
Novel:NC_037334.1_13317
Novel:NC_037334.1_13428
Novel:NC_037334.1_13476
Novel:NC_037334.1_13483
Novel:NC_037334.1_13496
Novel:NC_037334.1_13507
Novel:NC_037334.1_13547
Novel:NC_037334.1_13750
Novel:NC_037334.1_13772
Novel:NC_037334.1_13802
Novel:NC_037334.1_13880
Novel:NC_037334.1_13882
Novel:NC_037334.1_13904
Novel:NC_037334.1_14057
Novel:NC_037334.1_14096
Novel:NC_037334.1_14117
Novel:NC_037334.1_14125
Novel:NC_037334.1_14128
Novel:NC_037334.1_14136
Novel:NC_037334.1_14152
Novel:NC_037334.1_14160
Novel:NC_037334.1_14175
Novel:NC_037334.1_14176
Novel:NC_037334.1_14209
Novel:NC_037334.1_14232
Novel:NC_037334.1_14233
Novel:NC_037334.1_14301
Novel:NC_037334.1_14381
Novel:NC_037334.1_14497
Novel:NC_037334.1_14505
Novel:NC_037334.1_14531
Novel:NC_037334.1_14560
Novel:NC_037334.1_14562
Novel:NC_037334.1_14571
Novel:NC_037334.1_14572
Novel:NC_037334.1_14588
Novel:NC_037334.1_14620
Novel:NC_037334.1_14627
Novel:NC_037334.1_14826
Novel:NC_037334.1_14900
Novel:NC_037335.1_15080
Novel:NC_037335.1_15092
Novel:NC_037335.1_15206
Novel:NC_037335.1_15211
Novel:NC_037335.1_15534
Novel:NC_037335.1_15552
Novel:NC_037335.1_15554
Novel:NC_037335.1_15690
Novel:NC_037335.1_15704
Novel:NC_037335.1_15727
Novel:NC_037335.1_15735
Novel:NC_037335.1_15842
Novel:NC_037335.1_15901
Novel:NC_037335.1_15931
Novel:NC_037335.1_15992
Novel:NC_037335.1_16165
Novel:NC_037335.1_16174
Novel:NC_037335.1_16241
Novel:NC_037335.1_16320
Novel:NC_037335.1_16364
Novel:NC_037335.1_16383
Novel:NC_037335.1_16402
Novel:NC_037335.1_16479
Novel:NC_037335.1_16526
Novel:NC_037335.1_16549
Novel:NC_037335.1_16600
Novel:NC_037335.1_16716
Novel:NC_037335.1_16765
Novel:NC_037335.1_16781
Novel:NC_037336.1_16830
Novel:NC_037336.1_16889
Novel:NC_037336.1_16984
Novel:NC_037336.1_17113
Novel:NC_037336.1_17121
Novel:NC_037336.1_17292
Novel:NC_037336.1_17310
Novel:NC_037336.1_17348
Novel:NC_037336.1_17373
Novel:NC_037336.1_17405
Novel:NC_037336.1_17434
Novel:NC_037336.1_17586
Novel:NC_037336.1_17698
Novel:NC_037336.1_17775
Novel:NC_037336.1_17840
Novel:NC_037336.1_17854
Novel:NC_037336.1_17926
Novel:NC_037336.1_17933
Novel:NC_037336.1_17934
Novel:NC_037336.1_18086
Novel:NC_037336.1_18186
Novel:NC_037337.1_18486
Novel:NC_037337.1_18598
Novel:NC_037337.1_18718
Novel:NC_037337.1_18800
Novel:NC_037337.1_18804
Novel:NC_037337.1_18814
Novel:NC_037337.1_18818
Novel:NC_037337.1_18931
Novel:NC_037337.1_18938
Novel:NC_037337.1_19008
Novel:NC_037337.1_19017
Novel:NC_037337.1_19068
Novel:NC_037337.1_19072
Novel:NC_037337.1_19172
Novel:NC_037337.1_19199
Novel:NC_037337.1_19246
Novel:NC_037337.1_19462
Novel:NC_037337.1_19510
Novel:NC_037337.1_19515
Novel:NC_037337.1_19607
Novel:NC_037337.1_19752
Novel:NC_037337.1_19777
Novel:NC_037337.1_19800
Novel:NC_037337.1_19820
Novel:NC_037337.1_19851
Novel:NC_037337.1_19973
Novel:NC_037337.1_19987
Novel:NC_037337.1_20026
Novel:NC_037337.1_20171
Novel:NC_037337.1_20174
Novel:NC_037338.1_20331
Novel:NC_037338.1_20410
Novel:NC_037338.1_20433
Novel:NC_037338.1_20513
Novel:NC_037338.1_20581
Novel:NC_037338.1_20608
Novel:NC_037338.1_20627
Novel:NC_037338.1_20628
Novel:NC_037338.1_20658
Novel:NC_037338.1_20661
Novel:NC_037338.1_20726
Novel:NC_037338.1_20801
Novel:NC_037338.1_21021
Novel:NC_037338.1_21088
Novel:NC_037338.1_21281
Novel:NC_037338.1_21319
Novel:NC_037338.1_21351
Novel:NC_037338.1_21434
Novel:NC_037338.1_21648
Novel:NC_037338.1_21670
Novel:NC_037338.1_21676
Novel:NC_037338.1_21698
Novel:NC_037338.1_21772
Novel:NC_037338.1_21778
Novel:NC_037338.1_22002
Novel:NC_037338.1_22010
Novel:NC_037338.1_22091
Novel:NC_037338.1_22139
Novel:NC_037338.1_22157
Novel:NC_037338.1_22158
Novel:NC_037338.1_22187
Novel:NC_037339.1_22279
Novel:NC_037339.1_22327
Novel:NC_037339.1_22364
Novel:NC_037339.1_22425
Novel:NC_037339.1_22463
Novel:NC_037339.1_22526
Novel:NC_037339.1_22791
Novel:NC_037339.1_22829
Novel:NC_037339.1_22865
Novel:NC_037339.1_22895
Novel:NC_037339.1_22962
Novel:NC_037339.1_22969
Novel:NC_037339.1_22978
Novel:NC_037339.1_23028
Novel:NC_037339.1_23098
Novel:NC_037339.1_23122
Novel:NC_037339.1_23415
Novel:NC_037339.1_23421
Novel:NC_037339.1_23484
Novel:NC_037340.1_23521
Novel:NC_037340.1_23565
Novel:NC_037340.1_23617
Novel:NC_037340.1_23664
Novel:NC_037340.1_23665
Novel:NC_037340.1_23683
Novel:NC_037340.1_23712
Novel:NC_037340.1_23755
Novel:NC_037340.1_23941
Novel:NC_037340.1_23955
Novel:NC_037340.1_24033
Novel:NC_037340.1_24037
Novel:NC_037340.1_24120
Novel:NC_037340.1_24274
Novel:NC_037340.1_24327
Novel:NC_037340.1_24331
Novel:NC_037340.1_24401
Novel:NC_037340.1_24502
Novel:NC_037340.1_24512
Novel:NC_037340.1_24515
Novel:NC_037340.1_24562
Novel:NC_037340.1_24647
Novel:NC_037340.1_24656
Novel:NC_037340.1_24704
Novel:NC_037340.1_24705
Novel:NC_037340.1_24747
Novel:NC_037340.1_24762
Novel:NC_037340.1_24864
Novel:NC_037340.1_24906
Novel:NC_037340.1_24921
Novel:NC_037340.1_24942
Novel:NC_037340.1_24960
Novel:NC_037340.1_25035
Novel:NC_037340.1_25098
Novel:NC_037340.1_25107
Novel:NC_037340.1_25158
Novel:NC_037341.1_25233
Novel:NC_037341.1_25234
Novel:NC_037341.1_25281
Novel:NC_037341.1_25443
Novel:NC_037341.1_25446
Novel:NC_037341.1_25457
Novel:NC_037341.1_25535
Novel:NC_037341.1_25562
Novel:NC_037341.1_25701
Novel:NC_037341.1_25759
Novel:NC_037341.1_25974
Novel:NC_037341.1_25998
Novel:NC_037341.1_25999
Novel:NC_037341.1_26015
Novel:NC_037341.1_26028
Novel:NC_037341.1_26154
Novel:NC_037341.1_26206
Novel:NC_037341.1_26238
Novel:NC_037341.1_26279
Novel:NC_037341.1_26488
Novel:NC_037342.1_26572
Novel:NC_037342.1_26776
Novel:NC_037342.1_26808
Novel:NC_037342.1_26809
Novel:NC_037342.1_27024
Novel:NC_037342.1_27114
Novel:NC_037342.1_27161
Novel:NC_037342.1_27170
Novel:NC_037342.1_27216
Novel:NC_037342.1_27281
Novel:NC_037342.1_27317
Novel:NC_037342.1_27378
Novel:NC_037342.1_27652
Novel:NC_037342.1_27672
Novel:NC_037342.1_27764
Novel:NC_037342.1_27830
Novel:NC_037342.1_27925
Novel:NC_037342.1_28109
Novel:NC_037343.1_28411
Novel:NC_037343.1_28412
Novel:NC_037343.1_28436
Novel:NC_037343.1_28496
Novel:NC_037343.1_28577
Novel:NC_037343.1_28623
Novel:NC_037343.1_28740
Novel:NC_037343.1_28927
Novel:NC_037343.1_29036
Novel:NC_037343.1_29112
Novel:NC_037343.1_29214
Novel:NC_037343.1_29241
Novel:NC_037343.1_29318
Novel:NC_037343.1_29422
Novel:NC_037343.1_29424
Novel:NC_037343.1_29429
Novel:NC_037343.1_29440
Novel:NC_037343.1_29444
Novel:NC_037343.1_29478
Novel:NC_037343.1_29493
Novel:NC_037343.1_29516
Novel:NC_037343.1_29606
Novel:NC_037343.1_29617
Novel:NC_037343.1_29695
Novel:NC_037344.1_29711
Novel:NC_037344.1_29790
Novel:NC_037344.1_29894
Novel:NC_037344.1_29938
Novel:NC_037344.1_29942
Novel:NC_037344.1_29975
Novel:NC_037344.1_29986
Novel:NC_037344.1_30094
Novel:NC_037344.1_30205
Novel:NC_037344.1_30208
Novel:NC_037344.1_30262
Novel:NC_037344.1_30268
Novel:NC_037344.1_30337
Novel:NC_037344.1_30344
Novel:NC_037344.1_30359
Novel:NC_037344.1_30418
Novel:NC_037344.1_30437
Novel:NC_037344.1_30467
Novel:NC_037344.1_30729
Novel:NC_037344.1_30734
Novel:NC_037344.1_30741
Novel:NC_037344.1_30796
Novel:NC_037344.1_30803
Novel:NC_037344.1_30875
Novel:NC_037344.1_30908
Novel:NC_037344.1_31042
Novel:NC_037344.1_31063
Novel:NC_037344.1_31068
Novel:NC_037344.1_31071
Novel:NC_037345.1_31158
Novel:NC_037345.1_31160
Novel:NC_037345.1_31225
Novel:NC_037345.1_31229
Novel:NC_037345.1_31248
Novel:NC_037345.1_31251
Novel:NC_037345.1_31267
Novel:NC_037345.1_31289
Novel:NC_037345.1_31293
Novel:NC_037345.1_31387
Novel:NC_037345.1_31413
Novel:NC_037345.1_31599
Novel:NC_037345.1_31616
Novel:NC_037345.1_31639
Novel:NC_037345.1_31673
Novel:NC_037345.1_31687
Novel:NC_037345.1_31709
Novel:NC_037345.1_31761
Novel:NC_037345.1_31763
Novel:NC_037345.1_31770
Novel:NC_037345.1_31775
Novel:NC_037345.1_31788
Novel:NC_037345.1_31809
Novel:NC_037345.1_31854
Novel:NC_037345.1_31863
Novel:NC_037345.1_31907
Novel:NC_037345.1_31937
Novel:NC_037345.1_32034
Novel:NC_037345.1_32083
Novel:NC_037345.1_32262
Novel:NC_037345.1_32264
Novel:NC_037345.1_32275
Novel:NC_037345.1_32328
Novel:NC_037345.1_32438
Novel:NC_037345.1_32462
Novel:NC_037345.1_32546
Novel:NC_037345.1_32566
Novel:NC_037345.1_32574
Novel:NC_037345.1_32624
Novel:NC_037345.1_32647
Novel:NC_037345.1_32651
Novel:NC_037345.1_32697
Novel:NC_037345.1_32730
Novel:NC_037345.1_32758
Novel:NC_037345.1_32793
Novel:NC_037345.1_32814
Novel:NC_037345.1_32820
Novel:NC_037346.1_32917
Novel:NC_037346.1_33270
Novel:NC_037346.1_33311
Novel:NC_037346.1_33493
Novel:NC_037346.1_33495
Novel:NC_037346.1_33578
Novel:NC_037346.1_33613
Novel:NC_037346.1_33655
Novel:NC_037346.1_33668
Novel:NC_037346.1_33671
Novel:NC_037346.1_33731
Novel:NC_037346.1_33737
Novel:NC_037346.1_33743
Novel:NC_037346.1_33815
Novel:NC_037346.1_33831
Novel:NC_037346.1_33933
Novel:NC_037346.1_34067
Novel:NC_037346.1_34076
Novel:NC_037346.1_34093
Novel:NC_037346.1_34184
Novel:NC_037346.1_34203
Novel:NC_037346.1_34407
Novel:NC_037346.1_34411
Novel:NC_037346.1_34417
Novel:NC_037346.1_34422
Novel:NC_037346.1_34432
Novel:NC_037346.1_34434
Novel:NC_037346.1_34436
Novel:NC_037346.1_34450
Novel:NC_037346.1_34491
Novel:NC_037346.1_34562
Novel:NC_037346.1_34564
Novel:NC_037346.1_34637
Novel:NC_037346.1_34671
Novel:NC_037346.1_34673
Novel:NC_037346.1_34674
Novel:NC_037346.1_34746
Novel:NC_037347.1_34778
Novel:NC_037347.1_34779
Novel:NC_037347.1_34908
Novel:NC_037347.1_34961
Novel:NC_037347.1_34966
Novel:NC_037347.1_35352
Novel:NC_037347.1_35484
Novel:NC_037347.1_35502
Novel:NC_037347.1_35541
Novel:NC_037347.1_35671
Novel:NC_037347.1_35698
Novel:NC_037347.1_35776
Novel:NC_037347.1_35900
Novel:NC_037348.1_35905
Novel:NC_037348.1_35947
Novel:NC_037348.1_35954
Novel:NC_037348.1_36009
Novel:NC_037348.1_36077
Novel:NC_037348.1_36090
Novel:NC_037348.1_36192
Novel:NC_037348.1_36196
Novel:NC_037348.1_36357
Novel:NC_037348.1_36373
Novel:NC_037348.1_36404
Novel:NC_037348.1_36466
Novel:NC_037348.1_36668
Novel:NC_037348.1_36683
Novel:NC_037348.1_36725
Novel:NC_037348.1_36743
Novel:NC_037348.1_36752
Novel:NC_037348.1_36755
Novel:NC_037348.1_36881
Novel:NC_037348.1_36904
Novel:NC_037348.1_36913
Novel:NC_037348.1_36916
Novel:NC_037348.1_37002
Novel:NC_037348.1_37048
Novel:NC_037348.1_37152
Novel:NC_037348.1_37234
Novel:NC_037348.1_37313
Novel:NC_037349.1_37411
Novel:NC_037349.1_37490
Novel:NC_037349.1_37546
Novel:NC_037349.1_37578
Novel:NC_037349.1_37699
Novel:NC_037349.1_37765
Novel:NC_037349.1_37766
Novel:NC_037349.1_37779
Novel:NC_037349.1_37934
Novel:NC_037349.1_37944
Novel:NC_037349.1_37973
Novel:NC_037349.1_38067
Novel:NC_037349.1_38228
Novel:NC_037349.1_38319
Novel:NC_037349.1_38328
Novel:NC_037349.1_38376
Novel:NC_037349.1_38377
Novel:NC_037349.1_38386
Novel:NC_037349.1_38416
Novel:NC_037349.1_38462
Novel:NC_037349.1_38473
Novel:NC_037349.1_38485
Novel:NC_037349.1_38490
Novel:NC_037349.1_38494
Novel:NC_037350.1_38537
Novel:NC_037350.1_38562
Novel:NC_037350.1_38736
Novel:NC_037350.1_38755
Novel:NC_037350.1_38873
Novel:NC_037350.1_38879
Novel:NC_037350.1_38881
Novel:NC_037350.1_38906
Novel:NC_037350.1_38956
Novel:NC_037350.1_39083
Novel:NC_037350.1_39273
Novel:NC_037350.1_39275
Novel:NC_037350.1_39289
Novel:NC_037350.1_39336
Novel:NC_037350.1_39428
Novel:NC_037350.1_39777
Novel:NC_037350.1_39785
Novel:NC_037350.1_39820
Novel:NC_037350.1_39842
Novel:NC_037351.1_39978
Novel:NC_037351.1_40008
Novel:NC_037351.1_40081
Novel:NC_037351.1_40368
Novel:NC_037351.1_40389
Novel:NC_037351.1_40394
Novel:NC_037351.1_40418
Novel:NC_037351.1_40558
Novel:NC_037351.1_40599
Novel:NC_037351.1_40683
Novel:NC_037351.1_40694
Novel:NC_037351.1_40761
Novel:NC_037351.1_40909
Novel:NC_037351.1_40959
Novel:NC_037352.1_41026
Novel:NC_037352.1_41039
Novel:NC_037352.1_41063
Novel:NC_037352.1_41072
Novel:NC_037352.1_41077
Novel:NC_037352.1_41079
Novel:NC_037352.1_41137
Novel:NC_037352.1_41157
Novel:NC_037352.1_41178
Novel:NC_037352.1_41297
Novel:NC_037352.1_41359
Novel:NC_037352.1_41409
Novel:NC_037352.1_41411
Novel:NC_037352.1_41437
Novel:NC_037352.1_41445
Novel:NC_037352.1_41453
Novel:NC_037352.1_41460
Novel:NC_037352.1_41461
Novel:NC_037352.1_41464
Novel:NC_037352.1_41465
Novel:NC_037352.1_41475
Novel:NC_037352.1_41489
Novel:NC_037352.1_41556
Novel:NC_037352.1_41558
Novel:NC_037352.1_41598
Novel:NC_037352.1_41682
Novel:NC_037352.1_41697
Novel:NC_037352.1_41706
Novel:NC_037352.1_41768
Novel:NC_037352.1_41778
Novel:NC_037352.1_41780
Novel:NC_037352.1_41789
Novel:NC_037352.1_41806
Novel:NC_037352.1_41808
Novel:NC_037352.1_41810
Novel:NC_037352.1_41818
Novel:NC_037352.1_41820
Novel:NC_037352.1_41832
Novel:NC_037352.1_41889
Novel:NC_037352.1_41892
Novel:NC_037352.1_41915
Novel:NC_037352.1_41916
Novel:NC_037352.1_41920
Novel:NC_037352.1_41930
Novel:NC_037352.1_42096
Novel:NC_037352.1_42134
Novel:NC_037352.1_42162
Novel:NC_037352.1_42196
Novel:NC_037352.1_42209
Novel:NC_037352.1_42247
Novel:NC_037352.1_42249
Novel:NC_037352.1_42252
Novel:NC_037352.1_42258
Novel:NC_037353.1_42323
Novel:NC_037353.1_42405
Novel:NC_037353.1_42428
Novel:NC_037353.1_42461
Novel:NC_037353.1_42492
Novel:NC_037353.1_42512
Novel:NC_037353.1_42745
Novel:NC_037353.1_42908
Novel:NC_037353.1_43038
Novel:NC_037353.1_43124
Novel:NC_037353.1_43160
Novel:NC_037354.1_43335
Novel:NC_037354.1_43398
Novel:NC_037354.1_43400
Novel:NC_037354.1_43407
Novel:NC_037354.1_43421
Novel:NC_037354.1_43431
Novel:NC_037354.1_43599
Novel:NC_037354.1_43657
Novel:NC_037354.1_43677
Novel:NC_037354.1_43716
Novel:NC_037354.1_43875
Novel:NC_037354.1_44038
Novel:NC_037354.1_44073
Novel:NC_037354.1_44086
Novel:NC_037355.1_44112
Novel:NC_037355.1_44143
Novel:NC_037355.1_44289
Novel:NC_037355.1_44291
Novel:NC_037355.1_44316
Novel:NC_037355.1_44451
Novel:NC_037355.1_44552
Novel:NC_037355.1_44653
Novel:NC_037355.1_44725
Novel:NC_037356.1_44817
Novel:NC_037356.1_44901
Novel:NC_037356.1_44916
Novel:NC_037356.1_44950
Novel:NC_037356.1_44964
Novel:NC_037356.1_45017
Novel:NC_037356.1_45061
Novel:NC_037356.1_45099
Novel:NC_037356.1_45112
Novel:NC_037356.1_45165
Novel:NC_037356.1_45211
Novel:NC_037356.1_45263
Novel:NC_037356.1_45273
Novel:NC_037356.1_45277
Novel:NC_037356.1_45284
Novel:NC_037356.1_45315
Novel:NC_037356.1_45321
Novel:NC_037356.1_45343
Novel:NC_037356.1_45375
Novel:NC_037356.1_45381
Novel:NC_037356.1_45482
Novel:NC_037356.1_45509
Novel:NC_037356.1_45513
Novel:NC_037356.1_45599
Novel:NC_037356.1_45654
Novel:NC_037356.1_45665
Novel:NC_037356.1_45697
Novel:NC_037356.1_45745
Novel:NC_037356.1_45920
Novel:NC_037356.1_45939
Novel:NC_037356.1_45942
Novel:NC_037356.1_45986
Novel:NC_037356.1_46000
Novel:NC_037356.1_46015
Novel:NC_037356.1_46039
Novel:NC_037356.1_46042
Novel:NC_037357.1_46128
Novel:NC_037357.1_46347
Novel:NC_037357.1_46351
Novel:NC_037357.1_46363
Novel:NC_037357.1_46366
Novel:NC_037357.1_46442
Novel:NC_037357.1_46576
Novel:NC_037357.1_46620
Novel:NC_037357.1_46692
Novel:NC_037357.1_46788
Novel:NC_037357.1_46789
Novel:NC_037357.1_47057
Novel:NC_037357.1_47154
Novel:NC_037357.1_47158
Novel:NC_037357.1_47254
Novel:NC_037357.1_47259
Novel:NC_037357.1_47404
Novel:NC_037357.1_47470
Novel:NC_037357.1_47532
Novel:NC_037357.1_47556
Novel:NC_037357.1_47560
Novel:NC_037357.1_47562
Novel:NC_037357.1_47610
Novel:NC_037357.1_47659
Novel:NC_037357.1_47662
Novel:NC_037357.1_47695
Novel:NC_037357.1_47773
Novel:NC_037357.1_47870
Novel:NC_037357.1_47924
Novel:NC_037357.1_47925
Novel:NC_037357.1_47964
Novel:NC_037357.1_48116
Novel:oar-miR-370-3p
Novel:oar-miR-370-5p
Novel:oar-miR-377-3p
Novel:oar-miR-3956-3p
Novel:oar-miR-487b-5p
Novel:oar-miR-541-3p
